# Supplementary material
Source: Research Square preprint supplement (doi:10.21203/rs.3.rs-8662839/v1)
Supplement: Supplementary file 1 [file b72c7185430c3b7d768a38ee.xlsx]

## Sheet: Supp_table_S1
Supplementary Table S1. Univariate and multivariate analysis measuring association between LLIN mobility (represented by an observed mismatched LLIN tag codes and the corresponding household’s community code) and population subgroups at the bednet level. The area variable (urban/rural) and time since MDC were exclude from the multivariate to reduce collinearity with the district variable. P-value…
Risk Factor	Subgroups	Total	Mismatched LLINs (%)	Univariate OR (95% CI)	P-value	Multivariate OR (95% CI)	P-value
Malaria RDT	Negative	2088	152 (14.2)	Ref	-
	Positive	176	24 (13.6)	0.96 (0.60 - 1.47)	0.84
Time since MDC	<4 months	615	76 (12.4)	Ref	-
	4-6 months	1004	153 (15.2)	1.28 (0.95 - 1.72)	0.11
	6+ months	645	91 (14.1)	1.16 (0.84 - 1.62)	0.36
Household size	1-2	395	61 (15.4)	Ref	-	Ref	-
	3-4	616	79 (12.8)	0.81 (0.56 - 1.16)	0.24	0.69 (0.49 - 0.97)	0.031
	5-7	915	139 (15.2)	0.98 (0.71 - 1.37)	0.91	0.69 (0.48 - 1.00)	0.049
	8+	338	41 (12.1)	0.76 (0.49 - 1.15)	0.2	0.44 (0.26 - 0.74)	0.002
Change in household size	No change	251	27 (10.8)	Ref	-	Ref	-
	Size decrease	574	82 (14.3)	1.43 (0.95 - 2.22)	0.1	1.44 (0.96 - 2.20)	0.08
	Size increase	1439	211 (14.7)	1.38 (0.88 - 2.23)	0.17	1.75 (1.19 - 2.65)	0.006
Change in LLIN quantity	No change	444	66 (14.9)	Ref	-
	ITN decrease	724	102 (14.1)	0.92 (0.68 - 1.27)	0.61
	ITN increase	1096	152 (13.9)	0.94 (0.67 - 1.32)	0.71
Crowding (person/room)	Low	1606	214 (13.3)	Ref	-	Ref	-
	Medium	615	96 (15.6)	1.20 (0.92 - 1.56)	0.16	1.22 (0.91 - 1.63)	0.18
	High	43	10 (23.3)	1.97 (0.91 - 3.92)	0.06	1.16 (0.56 - 2.28)	0.665
Education	Non-college	434	45 (10.4)	Ref	-	Ref	-
	Undergrad	1164	175 (15.0)	1.53 (1.09 - 2.19)	0.02	1.78 (1.28 - 2.50)	0.001
	Postgrad	666	100 (15.0)	1.53 (1.06 - 2.24)	0.03	1.66 (1.16 - 2.41)	0.007
Bednet importance	No	357	42 (11.8)	Ref	-	Ref	-
	Yes	1907	278 (14.6)	1.28 (0.92 - 1.83)	0.16	1.15 (0.84 - 1.60)	0.41
Area	Urban	1448	257 (17.7)	Ref	-
	Rural	816	63 (7.7)	0.39 (0.29 - 0.52)	<0.001
District	Malabo	1599	281 (17.6)	Ref	-	Ref	-
	Baney	369	16 (4.3)	0.21 (0.12 - 0.25)	<0.001	0.24 (0.15 - 0.36)	<0.001
	Luba	212	11 (5.2)	0.26 (0.13 - 0.46)	<0.001	0.27 (0.15 - 0.46)	<0.001
	Riaba	84	12 (14.3)	0.78 (0.40 - 1.41)	0.44	0.52 (0.28 - 0.91)	0.029
Household sprayed	No	953	129 (13.5)	Ref	-
	Yes	1311	191 (14.6)	1.09 (0.86 - 1.39)	0.49
Traveled	No	2019	298 (14.8)	Ref	-	Ref	-
	Yes	245	22 (9.0)	0.57 (0.35 - 0.88)	0.01	0.86 (0.54 - 1.31)	0.49
SES	Low	362	40 (11.0)	Ref	-	Ref	-
	Low-Middle	508	89 (17.5)	1.71 (1.15 - 2.57)	0.001	1.28 (0.88 - 1.88)	0.198
	Middle	484	74 (15.3)	1.45 (0.97 - 2.21)	0.08	1.33 (0.90 - 1.99)	0.144
	Middle-High	458	68 (14.8)	1.40 (0.93 - 2.15)	0.11	1.03 (0.68 - 1.58)	0.869
	High	452	49 (10.8)	0.98 (0.63 - 1.53)	0.92	0.87 (0.54 - 1.40)	0.579
Open Eaves	No	1531	187 (12.2)	Ref	-	Ref	-
	Yes	733	133 (18.1)	1.59 (1.25 - 2.03)	<0.001	1.88 (1.48 - 2.38)	<0.001

## Sheet: Supp_table_S2
Supplementary Table S2. Household-level covariates stratified by LLIN tag code status (present vs. no tag code) and by concordance between LLIN tag code and MIS data (no mismatch vs. mismatched LLIN). Values are presented as household number (percentage). P-values were calculated using chi-squared tests comparing participants with a present tag code to those with no tag code. Variable-specific mi…
		LLIN tag code status
		No mismatch	Mismatched	Present tag code	No tag code
Variable	Subgroups	N (%)				p-value1
Malaria RDT2	Negative	1271 (92.6)	269 (91.5)	1129 (89.9)	2277 (87.7)	<0.001
	Positive	103 (7.4)	25 (8.5)	127 (10.1)	318 (12.3)
Time since MDC3	<4 months	328 (25.7)	55 (20.4)	383 (24.8)	658 (21.8)	0.08
	4-6 months	539 (42.2)	128 (47.6)	667 (43.1)	1330 (44.2)
	6+ months	410 (32.1)	86 (32.0)	496 (32.1)	1023 (34.0)
Household size	1-2	353 (25.7)	72 (24.6)	425 (25.5)	1014 (29.5)	0.02
	3-4	408 (29.7)	83 (28.3)	491 (29.5)	990 (28.8)
	5-7	457 (33.3)	111 (37.5)	567 (34.0)	1074 (31.3)
	8+	156 (11.3)	28 (9.6)	184 (11.0)	356 (10.4)
Change in household size	No change	192 (14.0)	31 (10.6)	223 (13.4)	475 (13.8)	0.35
	Size decrease	421 (30.6)	85 (29.0)	506 (30.3)	1100 (32.0)
	Size increase	761 (55.4)	178 (60.4)	938 (56.3)	1859 (54.1)
Crowding (person/room)3	Low	1023 (74.5)	207 (70.3)	1229 (73.7)	2578 (75.2)	<0.001
	Medium	79 (23.7)	79 (27.0)	404 (24.2)	801 (23.4)
	High	26 (1.9)	8 (2.7)	34 (2.0)	51 (1.5)
Education4	Non-college	228 (19.5)	31 (13.0)	259 (18.4)	499 (17.2)	0.61
	Undergrad	593 (50.6)	138 (57.6)	730 (51.8)	1525 (52.5)
	Postgrad	350 (29.9)	70 (29.4)	420 (29.8)	883 (30.4)
Bednet importance	No	242 (17.6)	45 (15.4)	287 (17.2)	845 (24.6)	<0.001
	Yes	1132 (82.4)	249 (84.6)	1380 (82.8)	2589 (75.4)
Area	Urban	862 (62.7)	246 (83.6)	1107 (66.4)	2240 (65.2)	0.41
	Rural	512 (37.3)	48 (16.4)	560 (33.6)	1194 (34.8)
District	Malabo	968 (70.5)	261 (88.7)	1228 (73.7)	2622 (76.4)	0.05
	Baney	207 (15.1)	13 (4.4)	220 (13.2)	437 (12.7)
	Luba	126 (9.2)	16 (5.5)	142 (8.5)	262 (7.6)
	Riaba	73 (5.3)	4 (1.4)	77 (4.6)	113 (3.3)
Household sprayed5	No	516 (43.1)	112 (46.0)	628 (43.6)	1548 (53.5)	<0.001
	Yes	680 (56.9)	132 (53.9)	811 (56.4)	1345 (46.5)
Traveled6	No	1224 (89.1)	250 (85.0)	1473 (88.4)	2885 (84.1)	<0.001
	Yes	150 (10.9)	44 (15.0)	194 (11.6)	547 (15.9)
SES	Low	285 (20.7)	40 (13.7)	325 (19.5)	696 (20.3)	<0.001
	Low-Middle	310 (22.6)	88 (29.7)	397 (23.8)	623 (18.1)
	Middle	292 (21.3)	77 (26.3)	369 (22.1)	651 (19.0)
	Middle-High	264 (19.2)	49 (16.7)	313 (18.8)	707 (20.6)
	High	223 (16.2)	40 (13.7)	263 (15.8)	757 (22.0)
Open Eaves	No	938 (68.3)	188 (63.8)	1125 (67.5)	2511 (73.1)	<0.001
	Yes	436 (31.7)	106 (36.2)	542 (32.5)	923 (26.9)
1. P-values were calculated using chi-squared test between present tag code versus no tag code
2. No tag group missing 839 observations
3. No tag group missing 423 observation; No mismatch group missing 97 observations; Mismatch groups missing 24 observations
4. No tag group missing 4 observations
5. No tag group missing 527 observations; No mismatch group missing 203 observations; Mismatch gorup missing 55 observations
6. No tag group missing 541 observations; No mismatch group missing 178 observations; Mismatch group missing 50 observations
7. No tag group missing 2 observations
